# Supplementary material for: Risk Factors for Lung Function Decline in Pediatric Asthma under Treatment: A Retrospective, Multicenter, Observational Study
Source: MDPI journal article supplement (doi:10.3390/children9101516), 2022-10-04
Supplement: s1 [file s1]

**Table S1.** Numbers of visits/spirometry at each visit.

|           | Normal      | Upward       | Downward    | Low          |
|-----------|-------------|--------------|-------------|--------------|
| 6-9 y.o   | 7 (1-43)    | 2.5 (1 – 29) | 13 (1 – 43) | 3.5 (1 – 23) |
| 10-12 y.o | 12 (1 – 52) | 10 (1 – 35)  | 14 (1 – 33) | 10 (3 – 21)  |
| 13-15 y.o | 3 (1 – 38)  | 4 (1 – 25)   | 4 (1 – 33)  | 3 (1 – 22)   |

Median (range)

**Table S2.** Characteristics of the subjects who were included and excluded for analysis.

|                                               | Analyzed<br>n=275 | Excluded<br>n=354 | P value |
|-----------------------------------------------|-------------------|-------------------|---------|
| Sex (boys), n (%)                             | 169 (62)          | 227 (64)          | 0.492   |
| Gestational age (weeks), median (range)       | 39 (38-40)        | 39 (38-40)        | 0.685   |
| Birth weight (g), median (range)              | 3002 (2767-3258)  | 3035 (2716-3346)  | 0.517   |
| Comorbid allergic diseases                    |                   |                   |         |
| Atopic dermatitis, n (%)                      | 135 (49)          | 160 (45)          | 0.311   |
| Perennial allergic rhinitis, n (%)            | 160 (58)          | 203 (57)          | 0.792   |
| Seasonal allergic rhinitis, n (%)             | 77 (28)           | 124 (35)          | 0.062   |
| Food allergy, n (%)                           | 129 (47)          | 139 (39)          | 0.041   |
| Other comorbidities, n (%)                    | 26 (17)           | 27 (8)            | 0.468   |
| Family history and environment                |                   |                   |         |
| Parental asthma, n (%)                        | 51 (20)           | 76 (23)           | 0.389   |
| Parental smoking, n (%)                       | 45 (33)           | 85 (43)           | 0.063   |
| Pet ownership, n (%)                          | 51 (24)           | 63 (26)           | 0.649   |
| Laboratory data <sup>#</sup>                  |                   |                   |         |
| Eosinophils (/μL), median (range)             | 500 (300-758)     | 490 (290-790)     | 0.429   |
| Total-IgE (IU/mL), median (range)             | 921 (415-1663)    | 807 (318-1661)    | 0.325   |
| HDM-sIgE (kU <sub>A</sub> /L), median (range) | 97.9 (27.5-136)   | 76.7 (20.4-125)   | 0.138   |
| JCP-sIgE (kU <sub>A</sub> /L), median (range) | 30.8 (4.1-100)    | 21.9 (4.2-84.7)   | 0.322   |
| Asthma treatment before 6 years old           |                   |                   |         |
| ICS                                           | 151 (59)          | 196 (62)          | 0.531   |
| LTRA                                          | 208 (81)          | 259 (83)          | 0.643   |
